# Supplementary material for: Genetic variants in interferon-λ 4 influences HCV clearance in Chinese Han population
Source: PubMed Central journal article supplement (PMC5301237; doi:10.1038/srep42408), 2017-02-10
Supplement: srep42408-s1.pdf [file srep42408-s1.pdf]

# Genetic variants in interferon- $\lambda$ 4 influences HCV clearance in Chinese Han population

Peng Huang<sup>1</sup>, Yinan Yao<sup>1</sup>, Ming Yue<sup>2</sup>, Ting Tian<sup>1</sup>, Hongbo Chen<sup>3</sup>, Mingzhu Chen<sup>1</sup>, Jie Wang<sup>4</sup>, Yun Zhang<sup>5</sup>, Rongbin Yu<sup>1\*</sup>

**Supplemental Table 1. Information of primers and probes for TaqMan allelic discrimination**

| Polymorphism             |        | Sequence(5'-3')                                   |
|--------------------------|--------|---------------------------------------------------|
| <i>IL28B</i> rs12979860  | Primer | F: GCGCGGAGTGCAATTCAAC<br>R: TGTACTGAACCAGGGAGCTC |
|                          | Probe  | FAM-CTGGTTCACGCCTTC-MGB<br>HEX-TGGTTCGCGCCTTC-MGB |
| <i>IFNL4</i> ss469415590 | Primer | F: GATGCGGCCGAGTGTCT<br>R: CTCCAGCGAGCGGTAGTG     |
|                          | Probe  | FAM-ATCGCAGCGGCC-MGB<br>HEX-TCGCAGAAGGCC-MGB      |

**Supplemental Table 2. Association of selected polymorphisms with RVR and EVR**

| <b>Genotype</b> | <b>N-RVR N(%)</b> | <b>RVR N(%)</b> | <b>OR (95% CI)</b> | <b>P value</b> | <b>N-EVR N(%)</b> | <b>EVR N(%)</b> | <b>OR (95% CI)</b> | <b>P value</b> |
|-----------------|-------------------|-----------------|--------------------|----------------|-------------------|-----------------|--------------------|----------------|
| rs12979860      |                   |                 |                    |                |                   |                 |                    |                |
| CC              | 129 (59.4)        | 116 (80.0)      | 1.00               |                | 37 (52.9)         | 204 (69.9)      | 1.00               |                |
| CT              | 67 (30.9)         | 12 (8.3)        | 0.19 (0.09-0.38)   | < 0.001        | 29 (41.4)         | 52 (17.8)       | 0.32 (0.17-0.58)   | < 0.001        |
| TT              | 21 (9.7)          | 17 (11.7)       | 0.98 (0.49-1.97)   | 0.951          | 4 (5.7)           | 36 (12.3)       | 1.41 (0.47-4.25)   | 0.545          |
| Dominant        |                   |                 | 0.37 (0.23-0.62)   | < 0.001        |                   |                 | 0.46 (0.26-0.81)   | 0.007          |
| Recessive       |                   |                 | 1.36 (0.68-2.71)   | 0.381          |                   |                 | 2.02 (0.69-5.96)   | 0.199          |
| Additive        |                   |                 | 0.67 (0.48-0.94)   | 0.022          |                   |                 | 0.78 (0.53-1.15)   | 0.206          |
| ss469415590     |                   |                 |                    |                |                   |                 |                    |                |
| TT/TT           | 169 (77.9)        | 134 (92.4)      | 1.00               |                | 38 (54.2)         | 265 (90.8)      | 1.00               |                |
| TT/ΔG           | 45 (20.7)         | 10 (6.9)        | 0.24 (0.11-0.53)   | < 0.001        | 30 (42.9)         | 25 (8.6)        | 0.11 (0.05-0.23)   | < 0.001        |
| ΔG/ΔG           | 3 (1.4)           | 1 (0.7)         | 0.48 (0.05-4.78)   | 0.528          | 2 (2.9)           | 2 (0.7)         | 0.12 (0.02-0.94)   | 0.043          |
| Dominant        |                   |                 | 0.26 (0.12-0.54)   | < 0.001        |                   |                 | 0.11 (0.06-0.22)   | < 0.001        |
| Recessive       |                   |                 | 0.58 (0.06-5.71)   | 0.638          |                   |                 | 0.21 (0.03-1.58)   | 0.130          |
| Additive        |                   |                 | 0.30 (0.15-0.60)   | 0.001          |                   |                 | 0.15 (0.08-0.29)   | < 0.001        |

Abbreviation: RVR, rapid virological response; EVR, early virological response.

Logistic regression analyses adjusted for age, gender, HCV RNA and platelets.

**Supplemental Table 3. Characteristics of association studies on *IFNL4* ss469415590 and HCV clearance and response to treatment**

| <b>a) Studies on HCV spontaneous clearance</b> |                |                  |                  |                        |                                        |
|------------------------------------------------|----------------|------------------|------------------|------------------------|----------------------------------------|
| First author, date                             | Genotype/Model | Chronic/Resolver | OR (95% CI)      | P value                | Participants                           |
| Prokunina-Olsson et al. 2013 (UHS)             | TT/TT          | 45/30            | 3.51             | 7.9×10 <sup>-5</sup>   | African-American and European-American |
|                                                | TT/ΔG          | 168/53           | 1.66             | 0.056                  |                                        |
|                                                | ΔG/ΔG          | 137/26           | 1.00             |                        |                                        |
| Prokunina-Olsson et al. 2013 (ALIVE)           | TT/TT          | 66/23            | 4.68             | 5.5×10 <sup>-6</sup>   | African-American                       |
|                                                | TT/ΔG          | 265/36           | 1.82             | 0.043                  |                                        |
|                                                | ΔG/ΔG          | 255/19           | 1.00             |                        |                                        |
| Bibert et al. 2013                             | TT/TT          | 189/63           |                  |                        | White ethnicity                        |
|                                                | TT/ΔG          | 292/29           |                  |                        |                                        |
|                                                | ΔG/ΔG          | 59/1             |                  |                        |                                        |
| Knapp et al. 2015                              | Additive       |                  | 0.28 (0.18-0.43) | 8.68×10 <sup>-9</sup>  | Egyptians                              |
|                                                | TT/TT          | 22/38            | 1.00             |                        |                                        |
|                                                | TT/ΔG+ΔG/ΔG    | 86/39            | 3.81 (1.99-7.28) | < 0.001                |                                        |
| <b>b) Studies on HCV response to treatment</b> |                |                  |                  |                        |                                        |
| First author, date                             | Genotype/Model | N-SVR/SVR        | OR (95% CI)      | P value                | Participants                           |
| Prokunina-Olsson et al. 2013 (Virahep-C)       | TT/TT          | 9/7              | 2.90             | 0.067                  | African-American and European-American |
|                                                | TT/ΔG          | 56/26            | 1.73             | 0.14                   |                                        |
|                                                | ΔG/ΔG          | 56/15            | 1.00             |                        |                                        |
| Prokunina-Olsson et al. 2013 (HALT-C)          | TT/TT          | 6/2              | 11.0             | 0.027                  | African-American and European-American |
|                                                | TT/ΔG          | 60/6             | 3.19             | 0.16                   |                                        |
|                                                | ΔG/ΔG          | 66/2             | 1.00             |                        |                                        |
| Bibert et al. 2013                             | TT/TT          | 37/152           |                  |                        | White ethnicity                        |
|                                                | TT/ΔG          | 131/161          |                  |                        |                                        |
|                                                | ΔG/ΔG          | 35/24            |                  |                        |                                        |
| St ätermayer et al. 2014 (Genotype 1)          | Additive       |                  | 0.38 (0.28-0.51) | 2.51×10 <sup>-10</sup> | Caucasians (98.8%)                     |
|                                                | TT/TT          | 32/114           |                  |                        |                                        |
|                                                | TT/ΔG          | 119/107          |                  |                        |                                        |

|                                         |             |         |                   |                          |                    |
|-----------------------------------------|-------------|---------|-------------------|--------------------------|--------------------|
|                                         | ΔG/ΔG       | 31/29   |                   |                          |                    |
|                                         | Additive    |         | 2.22 (1.63-3.02)  | < 0.001                  |                    |
| St ätermayer et al. 2014 (Genotype 2/3) | TT/TT       | 17/70   |                   |                          | Caucasians (98.8%) |
|                                         | TT/ΔG       | 22/76   |                   |                          |                    |
|                                         | ΔG/ΔG       | 9/14    |                   |                          |                    |
|                                         | Additive    |         | 1.51 (0.93-2.46)  | 0.093                    |                    |
| St ätermayer et al. 2014 (Genotype 4)   | TT/TT       | 5/32    |                   |                          | Caucasians (98.8%) |
|                                         | TT/ΔG       | 33/30   |                   |                          |                    |
|                                         | ΔG/ΔG       | 1/3     |                   |                          |                    |
|                                         | Additive    |         | 5.36 (2.46-11.68) | < 0.001                  |                    |
| Covolo et al. 2014 (Genotype 1)         | TT/TT       | 50/35   | 7.25 (1.91-27.51) | 0.004                    | Caucasians         |
|                                         | TT/ΔG       | 39/21   | 0.58 (0.19-1.83)  | 0.36                     |                    |
|                                         | ΔG/ΔG       | 10/9    | 1.00              |                          |                    |
| Covolo et al. 2014 (Genotype 2/3)       | TT/TT       | 5/59    | 1.60 (0.5-5.0)    | 0.4                      | Caucasians         |
|                                         | TT/ΔG+ΔG/ΔG | 4/85    | 1.00              |                          |                    |
| Nozawa et al. 2014 (Genotype 1)         | TT/TT       | 20/122  | 1.00              |                          | Japanese           |
|                                         | TT/ΔG+ΔG/ΔG | 32/40   | 4.73 (2.43-9.20)  | 0.019                    |                    |
| Miyamura et al. 2014 (Genotype 1)       | TT/TT       | 33/60   |                   |                          | Japanese           |
|                                         | TT/ΔG+ΔG/ΔG | 38/10   | 2.56 (1.01-6.56)  | 0.049                    |                    |
| Palmieri et al. 2014 (Genotype 1)       | TT/TT       | 36/74   | 4.73 (3.02-7.40)  | 9.87 × 10 <sup>-13</sup> | Caucasians         |
|                                         | TT/ΔG       | 229/102 |                   |                          |                    |
|                                         | ΔG/ΔG       | 70/28   |                   |                          |                    |
| Nagaoki et al. 2014 (Genotype 1)        | TT/TT       | 13/163  |                   | < 0.001                  | Japanese           |
|                                         | TT/ΔG+ΔG/ΔG | 44/63   |                   |                          |                    |

Abbreviation: N-SVR, non sustained virological response; SVR, sustained virological response.

Additive: TT/TT vs TT/ΔG vs ΔG/ΔG
